# Supplementary material for: Implementing LGBTQ+ inclusive mental healthcare into practice — A rapid mixed-methods implementation context assessment of an Australian local health network
Source: Research Square preprint supplement (doi:10.21203/rs.3.rs-8072582/v1), 2025-12-04
Supplement: Supplementary file 1 [file 73bae022e7b4d01c4ab93241.docx]

# Appendix B: SRQR Reporting

| No. | Topic | | Item | | Description |
| --- | --- | --- | --- | --- | --- |
| *Title & abstract* | | | | | |
| S1 | Title | | Concise description of the nature and topic of the study, identifying the study as qualitative or indicating the approach. | | Study title indicates approach (mixed-methods). |
| S2 | Abstract | | Summary of key elements of the study using the abstract format of the intended publication. | | Done. |
| Introduction | | | | | |
| S3 | Problem formulation | | Description and significance of the problem/phenomenon studied; review of relevant theory and empirical work, problem statement. | | Done |
| S4 |  | | Purpose or research question | | Done |
| Methods | | | | | |
| S5 | Qualitative approach and research paradigm | | Qualitative approach and guiding theory if appropriate; identifying the research paradigm is also recommended; rationale for methodology. | | Framework coding of ethnographic field notes; standard non-parametric significance testing and exploratory network analytic techniques both justified. Guided by i-PARIHS framework. Rationale is to illuminate subjective scoring ranges provided by participants with examples. |
| S6 | Researcher characteristics & reflexivity | | Researchers’ characteristics that may influence the research, including personal attributes, qualifications & experience, relationships with participants, etc. | | Accounted for using the Dead Reckoning framework [22]. |
| S7 | Context | | Setting, site, salient contextual factors, rationale. | | All accounted for. |
| S8 | Sampling strategy | | How and why research participants, documents, or events were selected; criteria for deciding when no further sampling was necessary (ie., sampling saturation). Rationale. | | Accounted for. See: subcommittee involvement, snowball recruitment of additional participants to ensure saturation, temporal bounds on sampling strategy. Rationale that this will be followed by richer data collection methods (interviews, etc.) with a larger sample; rapidness of this assessment to ensure that effort is well targeted. |
| S9 | Ethical issues pertaining to human subjects. | | Documentation of approval by an appropriate ethics review board and participant consent; other confidentiality and data security issues. | | Removed for blinding in review process, but ethics approval in place. Confidentiality strategies discussed in “participants” section of methods. |
| S10 | Data collection methods | | Types of data collected, details of data collection procedures, triangulation of sources/methods, & modification of procedures in response to evolving study findings. | | Documented extensively in “materials” section of methods, including chronicity of field note writing, researcher involvement in different stages of study, triangulation methods (ie., framework coding) between qualitative and quantitative data. Evolving, iterative recruitment and data collection processes described in “participants” section of methods. |
| S11 | Data collection instruments and technologies | | Description of instruments (eg., interview guides, questionnaires” and devices (eg. audio recorders) used for data collection. | | Lack of audio recording described in “procedure” section of methods. Mi-PARIHS tool described in “materials” section of methods. |
| S12 | Units of study | | Number and relevant characteristics of participants, documents, or events included in study; level of participation. | | Reported in “participants” section of method, with limitations on reporting due to confidentiality concerns. Number of field notes files, and number of codes for each item, reported in results. |
| S13 | Data processing | | Methods for processing data prior to and during analysis, including transcription, etc. | | Reported in “procedure” section of method. |
| S14 | Data analysis | | Process by which inferences, themes, etc. were identified and developed, including the researchers involved in the data analysis. | | Reported in “analysis plan” section of method. |
| S15 | Techniques to enhance trustworthiness | | Techniques to enhance trustworthiness and credibility of data analysis | | Consensus methods reported in “analysis plan” section of method. |
| Results & findings | | | | | |
| S16 | Synthesis and interpretation | | Main findings (eg., interpretations, inferences, and themes); might include development of a theory or model, or integration with prior research/theory. | | Done. |
| S17 | Links to empirical data | | Evidence (eg., quotes, field notes, text excerpts, photographs) to substantiate analytic findings. | | Present throughout results. |
| Discussion | | | | | |
| S18 | Integration with prior work, implications, transferability, and contribution(s) to the field. | | Short summary of main findings, explanation of how findings and conclusions connect to,, support, elaborate on or challenge conclusions of earlier scholarship; discussion of scope of application/generalizability; identification of unique contribution(s) to scholarship in discipline or field. | | Short summary and connection to literature present. Scope and generalisability discussed in limitations. Unique contribution discussed in relation to network analytic findings and approach. |
| S19 | Limitations | | Trustworthiness and limitations of findings | | Discussed potential bias issues with regard to sample size and single coder. Discussed limited generalisability of these data. |
| Other | | | | | |
| S20 | Conflicts of interest | Potential sources of influence or perceived influence on study and conclusion; how these were managed. | | Discussed management of two clinical researchers affiliated with the LHN’s involvement in the positionality table. | |
| S21 | Funding | Sources of funding and other support; role of funders in data collection, interpretation, and reporting. | | Discussed in “Ethics, funding, standards, and conformance” section of methods. | |
