# Supplementary material for: Implementing LGBTQ+ inclusive mental healthcare into practice — A rapid mixed-methods implementation context assessment of an Australian local health network
Source: Research Square preprint supplement (doi:10.21203/rs.3.rs-8072582/v1), 2025-12-04
Supplement: Supplementary file 2 [file 9a8cf1f1e3495f9618b1d1cb.docx]

# Appendix A: Full Mi-PARIHS Correlation Matrix

| ***Term*** | The LGBTQ+ Model of Care is informed by strong evidence | The LGBTQ+ Model of Care is accessible and useable | The LGBTQ+ Model of Care requires adaptation or tailoring to implement | The LGBTQ+ Model of Care has clear outcome measures | The LGBTQ+ Model of Care will be trusted | The LGBTQ+ Model of Care offers an advantage over current practice | There is local data that supports the need to introduce the LGBTQ+ Model of Care | Individuals/team want to implement the LGBTQ+ Model of Care in practice | There is a shared view on LGBTQ+ Models of Care | Key individuals/stakeholders are supportive of implementing the LGBTQ+ Model of Care | There are clinical champions supportive of implementing the LGBTQ+ Model of Care | Individuals/team have the knowledge/skills to implement the LGBTQ+ Model of Care | Barriers have been identified in discussion with individuals/team | There is sufficient time to implement the LGBTQ+ Model of Care | There is commitment to provide appropriate resources to implement the LGBTQ+ Model of Care | The local infrastructure can support the implementation of the LGBTQ+ Model of Care | Individuals feel actively involved in decisions that affect them | There is clarity around individual’s roles and responsibilities | The culture supports innovation and change | The formal and informal leaders create a vision, motivation and reinforcement for the implementation of the LGBTQ+ Model of Care | There is good multi-disciplinary collaboration and teamwork | There are mechanisms for staff to receive feedback on their work | There is past experience of implementing change | There is a learning and innovation culture | The LGBTQ+ Model of Care aligns with the strategic priorities of the organisation | The organisation has systems and processes in place that will support the implementation of the LGBTQ+ Model of Care | The organisational culture supports innovation and change | There is a history of successful and sustained change across the organisation | The organisational values are clear | Organisational and/or senior leaders support opportunities for engagement and consultation from consumers, public and staff | Organisational and/or senior leaders actively engage with local staff | The LGBTQ+ Model of Care aligns with the strategic priorities of the wider health system | There are incentives or disincentives that reinforce the implementation of the LGBTQ+ Model of Care | There are inter-organisational networks that would be helpful |
| --- | --- | --- | --- | --- | --- | --- | --- | --- | --- | --- | --- | --- | --- | --- | --- | --- | --- | --- | --- | --- | --- | --- | --- | --- | --- | --- | --- | --- | --- | --- | --- | --- | --- | --- |
| The LGBTQ+ Model of Care is informed by strong evidence | 0.000 | 0.783 | 0.348 | 0.201 | 0.292 | 0.542 | 0.260 | 0.251 | -0.035 | 0.260 | -0.022 | 0.328 | 0.207 | -0.136 | 0.110 | 0.299 | -0.107 | 0.000 | 0.175 | 0.000 | 0.000 | 0.000 | -0.245 | -0.315 | 0.175 | -0.363 | -0.363 | -0.542 | -0.245 | 0.000 | -0.294 | -0.363 | -0.450 | 0.738 |
| The LGBTQ+ Model of Care is accessible and useable | 0.783 | 0.000 | 0.332 | 0.286 | 0.590 | 0.758 | 0.297 | 0.324 | 0.180 | 0.382 | -0.020 | -0.168 | 0.340 | 0.035 | 0.384 | 0.000 | -0.171 | -0.191 | 0.103 | 0.000 | 0.000 | -0.191 | -0.283 | -0.265 | 0.103 | -0.191 | -0.191 | -0.284 | -0.283 | -0.191 | -0.283 | -0.191 | -0.050 | 0.635 |
| The LGBTQ+ Model of Care requires adaptation or tailoring to implement | 0.348 | 0.332 | 0.000 | 0.392 | 0.333 | 0.389 | 0.039 | 0.000 | -0.221 | -0.149 | -0.346 | 0.079 | 0.160 | 0.000 | -0.238 | 0.000 | -0.346 | -0.149 | -0.221 | 0.000 | 0.000 | -0.149 | -0.221 | -0.690 | -0.221 | -0.149 | -0.149 | -0.222 | -0.221 | -0.149 | -0.221 | -0.149 | 0.043 | 0.041 |
| The LGBTQ+ Model of Care has clear outcome measures | 0.201 | 0.286 | 0.392 | 0.000 | 0.814 | 0.588 | 0.377 | 0.563 | 0.291 | 0.315 | 0.250 | -0.008 | 0.732 | 0.156 | 0.175 | -0.415 | -0.219 | 0.053 | -0.085 | 0.000 | 0.000 | -0.368 | -0.546 | -0.392 | 0.255 | 0.473 | 0.473 | 0.078 | 0.362 | 0.053 | 0.418 | 0.473 | 0.255 | 0.402 |
| The LGBTQ+ Model of Care will be trusted | 0.292 | 0.590 | 0.333 | 0.814 | 0.000 | 0.809 | 0.524 | 0.699 | 0.232 | 0.447 | 0.297 | -0.144 | 0.615 | 0.320 | 0.555 | -0.449 | -0.142 | -0.191 | 0.146 | 0.000 | 0.000 | -0.191 | -0.284 | -0.166 | 0.146 | 0.447 | 0.447 | 0.190 | 0.146 | -0.191 | 0.232 | 0.447 | 0.253 | 0.406 |
| The LGBTQ+ Model of Care offers an advantage over current practice | 0.542 | 0.758 | 0.389 | 0.588 | 0.809 | 0.000 | 0.619 | 0.627 | 0.442 | 0.671 | 0.260 | 0.079 | 0.479 | -0.135 | 0.356 | -0.350 | 0.043 | -0.149 | 0.332 | 0.000 | 0.000 | -0.149 | -0.221 | -0.207 | 0.332 | -0.149 | -0.149 | -0.222 | -0.221 | -0.149 | -0.221 | -0.149 | 0.043 | 0.652 |
| There is local data that supports the need to introduce the LGBTQ+ Model of Care | 0.260 | 0.297 | 0.039 | 0.377 | 0.524 | 0.619 | 0.000 | 0.529 | 0.441 | 0.415 | 0.345 | 0.310 | 0.515 | 0.045 | 0.384 | -0.354 | -0.104 | -0.363 | 0.616 | 0.000 | 0.000 | 0.415 | 0.301 | -0.068 | -0.014 | -0.052 | -0.052 | -0.077 | -0.329 | -0.363 | -0.287 | -0.052 | 0.255 | 0.219 |
| Individuals/team want to implement the LGBTQ+ Model of Care in practice | 0.251 | 0.324 | 0.000 | 0.563 | 0.699 | 0.627 | 0.529 | 0.000 | 0.265 | 0.561 | 0.207 | 0.310 | 0.136 | 0.509 | 0.555 | 0.060 | 0.429 | 0.280 | 0.605 | 0.000 | 0.000 | 0.280 | 0.038 | 0.221 | 0.605 | 0.280 | 0.280 | 0.000 | 0.416 | 0.280 | 0.416 | 0.280 | -0.118 | 0.529 |
| There is a shared view on LGBTQ+ Models of Care | -0.035 | 0.180 | -0.221 | 0.291 | 0.232 | 0.442 | 0.441 | 0.265 | 0.000 | 0.742 | 0.313 | -0.207 | 0.476 | -0.135 | 0.172 | -0.348 | 0.078 | -0.148 | 0.380 | 0.000 | 0.000 | -0.148 | -0.220 | -0.145 | 0.380 | -0.148 | -0.148 | -0.221 | -0.220 | -0.148 | -0.220 | -0.148 | 0.204 | 0.258 |
| Key individuals/stakeholders are supportive of implementing the LGBTQ+ Model of Care | 0.260 | 0.382 | -0.149 | 0.315 | 0.447 | 0.671 | 0.415 | 0.561 | 0.742 | 0.000 | 0.581 | 0.053 | 0.321 | -0.135 | 0.478 | -0.235 | 0.290 | -0.100 | 0.593 | 0.000 | 0.000 | -0.100 | -0.148 | 0.181 | 0.593 | -0.100 | -0.100 | -0.149 | -0.148 | -0.100 | -0.148 | -0.100 | -0.232 | 0.547 |
| There are clinical champions supportive of implementing the LGBTQ+ Model of Care | -0.022 | -0.020 | -0.346 | 0.250 | 0.297 | 0.260 | 0.345 | 0.207 | 0.313 | 0.581 | 0.000 | 0.159 | 0.497 | -0.682 | 0.494 | -0.545 | -0.153 | -0.232 | 0.204 | 0.000 | 0.000 | -0.232 | 0.086 | 0.657 | 0.204 | 0.232 | 0.232 | 0.476 | -0.031 | -0.232 | 0.031 | 0.232 | 0.086 | 0.225 |
| Individuals/team have the knowledge/skills to implement the LGBTQ+ Model of Care | 0.328 | -0.168 | 0.079 | -0.008 | -0.144 | 0.079 | 0.310 | 0.310 | -0.207 | 0.053 | 0.159 | 0.000 | -0.222 | -0.308 | -0.164 | 0.328 | 0.305 | 0.424 | 0.379 | 0.000 | 0.000 | 0.424 | 0.379 | 0.296 | 0.379 | -0.371 | -0.371 | -0.237 | 0.093 | 0.424 | -0.014 | -0.371 | -0.392 | 0.363 |
| Barriers have been identified in discussion with individuals/team | 0.207 | 0.340 | 0.160 | 0.732 | 0.615 | 0.479 | 0.515 | 0.136 | 0.476 | 0.321 | 0.497 | -0.222 | 0.000 | -0.270 | 0.248 | -0.662 | -0.639 | -0.428 | -0.130 | 0.000 | 0.000 | -0.428 | -0.419 | -0.366 | -0.130 | 0.321 | 0.321 | 0.160 | -0.130 | -0.428 | -0.029 | 0.321 | 0.475 | 0.223 |
| There is sufficient time to implement the LGBTQ+ Model of Care | -0.136 | 0.035 | 0.000 | 0.156 | 0.320 | -0.135 | 0.045 | 0.509 | -0.135 | -0.135 | -0.682 | -0.308 | -0.270 | 0.000 | 0.493 | 0.533 | 0.320 | 0.000 | 0.400 | 0.000 | 0.000 | 0.539 | 0.139 | -0.816 | -0.135 | 0.539 | 0.539 | 0.000 | 0.539 | 0.000 | 0.539 | 0.539 | -0.139 | -0.365 |
| There is commitment to provide appropriate resources to implement the LGBTQ+ Model of Care | 0.110 | 0.384 | -0.238 | 0.175 | 0.555 | 0.356 | 0.384 | 0.555 | 0.172 | 0.478 | 0.494 | -0.164 | 0.248 | 0.493 | 0.000 | -0.068 | -0.109 | -0.319 | 0.494 | 0.000 | 0.000 | 0.212 | 0.315 | 0.589 | 0.064 | 0.478 | 0.478 | 0.515 | 0.064 | -0.319 | 0.172 | 0.478 | 0.126 | 0.108 |
| The local infrastructure can support the implementation of the LGBTQ+ Model of Care | 0.299 | 0.000 | 0.000 | -0.415 | -0.449 | -0.350 | -0.354 | 0.060 | -0.348 | -0.235 | -0.545 | 0.328 | -0.662 | 0.533 | -0.068 | 0.000 | 0.310 | 0.469 | 0.221 | 0.000 | 0.000 | 0.469 | 0.221 | 0.045 | 0.221 | -0.235 | -0.235 | -0.350 | 0.221 | 0.469 | 0.126 | -0.235 | -0.545 | 0.093 |
| Individuals feel actively involved in decisions that affect them | -0.107 | -0.171 | -0.346 | -0.219 | -0.142 | 0.043 | -0.104 | 0.429 | 0.078 | 0.290 | -0.153 | 0.305 | -0.639 | 0.320 | -0.109 | 0.310 | 0.000 | 0.581 | 0.431 | 0.000 | 0.000 | 0.290 | 0.078 | 0.361 | 0.666 | -0.232 | -0.232 | -0.346 | 0.313 | 0.581 | 0.204 | -0.232 | -0.540 | 0.280 |
| There is clarity around individual’s roles and responsibilities | 0.000 | -0.191 | -0.149 | 0.053 | -0.191 | -0.149 | -0.363 | 0.280 | -0.148 | -0.100 | -0.232 | 0.424 | -0.428 | 0.000 | -0.319 | 0.469 | 0.581 | 0.000 | -0.148 | 0.000 | 0.000 | -0.100 | -0.148 | 0.181 | 0.742 | -0.100 | -0.100 | -0.149 | 0.742 | 1.000 | 0.593 | -0.100 | -0.232 | 0.437 |
| The culture supports innovation and change | 0.175 | 0.103 | -0.221 | -0.085 | 0.146 | 0.332 | 0.616 | 0.605 | 0.380 | 0.593 | 0.204 | 0.379 | -0.130 | 0.400 | 0.494 | 0.221 | 0.431 | -0.148 | 0.000 | 0.000 | 0.000 | 0.742 | 0.500 | 0.273 | 0.280 | -0.148 | -0.148 | -0.221 | -0.220 | -0.148 | -0.220 | -0.148 | -0.345 | 0.147 |
| The formal and informal leaders create a vision, motivation and reinforcement for the implementation of the LGBTQ+ Model of Care | 0.000 | 0.000 | 0.000 | 0.000 | 0.000 | 0.000 | 0.000 | 0.000 | 0.000 | 0.000 | 0.000 | 0.000 | 0.000 | 0.000 | 0.000 | 0.000 | 0.000 | 0.000 | 0.000 | 0.000 | 0.000 | 0.000 | 0.000 | 0.000 | 0.000 | 0.000 | 0.000 | 0.000 | 0.000 | 0.000 | 0.000 | 0.000 | 0.000 | 0.000 |
| There is good multi-disciplinary collaboration and teamwork | 0.000 | 0.000 | 0.000 | 0.000 | 0.000 | 0.000 | 0.000 | 0.000 | 0.000 | 0.000 | 0.000 | 0.000 | 0.000 | 0.000 | 0.000 | 0.000 | 0.000 | 0.000 | 0.000 | 0.000 | 0.000 | 0.000 | 0.000 | 0.000 | 0.000 | 0.000 | 0.000 | 0.000 | 0.000 | 0.000 | 0.000 | 0.000 | 0.000 | 0.000 |
| There are mechanisms for staff to receive feedback on their work | 0.000 | -0.191 | -0.149 | -0.368 | -0.191 | -0.149 | 0.415 | 0.280 | -0.148 | -0.100 | -0.232 | 0.424 | -0.428 | 0.539 | 0.212 | 0.469 | 0.290 | -0.100 | 0.742 | 0.000 | 0.000 | 0.000 | 0.742 | 0.181 | -0.148 | -0.100 | -0.100 | -0.149 | -0.148 | -0.100 | -0.148 | -0.100 | -0.232 | -0.273 |
| There is past experience of implementing change | -0.245 | -0.283 | -0.221 | -0.546 | -0.284 | -0.221 | 0.301 | 0.038 | -0.220 | -0.148 | 0.086 | 0.379 | -0.419 | 0.139 | 0.315 | 0.221 | 0.078 | -0.148 | 0.500 | 0.000 | 0.000 | 0.742 | 0.000 | 0.572 | -0.220 | -0.148 | -0.148 | 0.332 | -0.220 | -0.148 | -0.220 | -0.148 | 0.125 | -0.405 |
| There is a learning and innovation culture | -0.315 | -0.265 | -0.690 | -0.392 | -0.166 | -0.207 | -0.068 | 0.221 | -0.145 | 0.181 | 0.657 | 0.296 | -0.366 | -0.816 | 0.589 | 0.045 | 0.361 | 0.181 | 0.273 | 0.000 | 0.000 | 0.181 | 0.572 | 0.000 | 0.273 | 0.181 | 0.181 | 0.621 | 0.273 | 0.181 | 0.273 | 0.181 | -0.070 | 0.045 |
| The LGBTQ+ Model of Care aligns with the strategic priorities of the organisation | 0.175 | 0.103 | -0.221 | 0.255 | 0.146 | 0.332 | -0.014 | 0.605 | 0.380 | 0.593 | 0.204 | 0.379 | -0.130 | -0.135 | 0.064 | 0.221 | 0.666 | 0.742 | 0.280 | 0.000 | 0.000 | -0.148 | -0.220 | 0.273 | 0.000 | -0.148 | -0.148 | -0.221 | 0.500 | 0.742 | 0.380 | -0.148 | -0.345 | 0.722 |
| The organisation has systems and processes in place that will support the implementation of the LGBTQ+ Model of Care | -0.363 | -0.191 | -0.149 | 0.473 | 0.447 | -0.149 | -0.052 | 0.280 | -0.148 | -0.100 | 0.232 | -0.371 | 0.321 | 0.539 | 0.478 | -0.235 | -0.232 | -0.100 | -0.148 | 0.000 | 0.000 | -0.100 | -0.148 | 0.181 | -0.148 | 0.000 | 1.000 | 0.671 | 0.593 | -0.100 | 0.742 | 1.000 | 0.290 | -0.273 |
| The organisational culture supports innovation and change | -0.363 | -0.191 | -0.149 | 0.473 | 0.447 | -0.149 | -0.052 | 0.280 | -0.148 | -0.100 | 0.232 | -0.371 | 0.321 | 0.539 | 0.478 | -0.235 | -0.232 | -0.100 | -0.148 | 0.000 | 0.000 | -0.100 | -0.148 | 0.181 | -0.148 | 1.000 | 0.000 | 0.671 | 0.593 | -0.100 | 0.742 | 1.000 | 0.290 | -0.273 |
| There is a history of successful and sustained change across the organisation | -0.542 | -0.284 | -0.222 | 0.078 | 0.190 | -0.222 | -0.077 | 0.000 | -0.221 | -0.149 | 0.476 | -0.237 | 0.160 | 0.000 | 0.515 | -0.350 | -0.346 | -0.149 | -0.221 | 0.000 | 0.000 | -0.149 | 0.332 | 0.621 | -0.221 | 0.671 | 0.671 | 0.000 | 0.332 | -0.149 | 0.442 | 0.671 | 0.563 | -0.408 |
| The organisational values are clear | -0.245 | -0.283 | -0.221 | 0.362 | 0.146 | -0.221 | -0.329 | 0.416 | -0.220 | -0.148 | -0.031 | 0.093 | -0.130 | 0.539 | 0.064 | 0.221 | 0.313 | 0.742 | -0.220 | 0.000 | 0.000 | -0.148 | -0.220 | 0.273 | 0.500 | 0.593 | 0.593 | 0.332 | 0.000 | 0.742 | 0.980 | 0.593 | 0.008 | 0.170 |
| Organisational and/or senior leaders support opportunities for engagement and consultation from consumers, public and staff | 0.000 | -0.191 | -0.149 | 0.053 | -0.191 | -0.149 | -0.363 | 0.280 | -0.148 | -0.100 | -0.232 | 0.424 | -0.428 | 0.000 | -0.319 | 0.469 | 0.581 | 1.000 | -0.148 | 0.000 | 0.000 | -0.100 | -0.148 | 0.181 | 0.742 | -0.100 | -0.100 | -0.149 | 0.742 | 0.000 | 0.593 | -0.100 | -0.232 | 0.437 |
| Organisational and/or senior leaders actively engage with local staff | -0.294 | -0.283 | -0.221 | 0.418 | 0.232 | -0.221 | -0.287 | 0.416 | -0.220 | -0.148 | 0.031 | -0.014 | -0.029 | 0.539 | 0.172 | 0.126 | 0.204 | 0.593 | -0.220 | 0.000 | 0.000 | -0.148 | -0.220 | 0.273 | 0.380 | 0.742 | 0.742 | 0.442 | 0.980 | 0.593 | 0.000 | 0.742 | 0.078 | 0.074 |
| The LGBTQ+ Model of Care aligns with the strategic priorities of the wider health system | -0.363 | -0.191 | -0.149 | 0.473 | 0.447 | -0.149 | -0.052 | 0.280 | -0.148 | -0.100 | 0.232 | -0.371 | 0.321 | 0.539 | 0.478 | -0.235 | -0.232 | -0.100 | -0.148 | 0.000 | 0.000 | -0.100 | -0.148 | 0.181 | -0.148 | 1.000 | 1.000 | 0.671 | 0.593 | -0.100 | 0.742 | 0.000 | 0.290 | -0.273 |
| There are incentives or disincentives that reinforce the implementation of the LGBTQ+ Model of Care | -0.450 | -0.050 | 0.043 | 0.255 | 0.253 | 0.043 | 0.255 | -0.118 | 0.204 | -0.232 | 0.086 | -0.392 | 0.475 | -0.139 | 0.126 | -0.545 | -0.540 | -0.232 | -0.345 | 0.000 | 0.000 | -0.232 | 0.125 | -0.070 | -0.345 | 0.290 | 0.290 | 0.563 | 0.008 | -0.232 | 0.078 | 0.290 | 0.000 | -0.349 |
| There are inter-organisational networks that would be helpful | 0.738 | 0.635 | 0.041 | 0.402 | 0.406 | 0.652 | 0.219 | 0.529 | 0.258 | 0.547 | 0.225 | 0.363 | 0.223 | -0.365 | 0.108 | 0.093 | 0.280 | 0.437 | 0.147 | 0.000 | 0.000 | -0.273 | -0.405 | 0.045 | 0.722 | -0.273 | -0.273 | -0.408 | 0.170 | 0.437 | 0.074 | -0.273 | -0.349 | 0.000 |
